# Supplementary material for: Iron deficiency and the loss of chloroplast iron–sulfur cluster assembly trigger distinct transcriptome changes in Arabidopsis rosettes
Source: Royal Society of Chemistry journal article supplement (doi:10.1039/d0mt00175a), 2020-10-13
Supplement: d0mt00175a2.pdf [file d0mt00175a2.pdf]

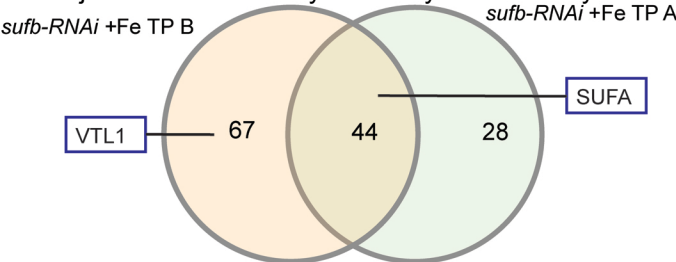

Downregulated in *sufb-RNAi* +Fe compared to WT+Fe

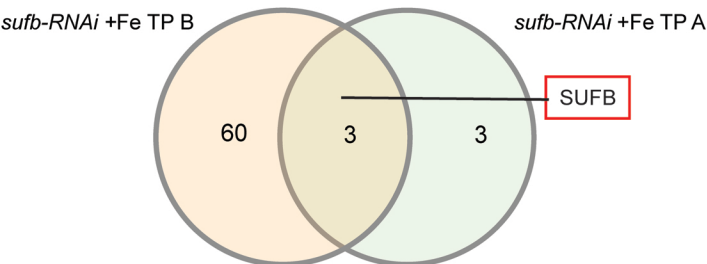

**Supplemental Figure 1: Transcript changes specific to the loss of SufB.** Numbers in each of the Venn diagram segments represent the number of differentially up or down-regulated transcripts that are either unique to a treatment or shared across TP A and TP B. Only significantly differentially expressed genes with a fold change of at least 1.5 x higher or lower than WT +Fe control are represented. Down-regulated genes are those that are decreased in expression in *sufb2-2* +Fe (*sufb-RNAi* +Fe) compared to WT +Fe control; Up-regulated genes are these that have increased expression in *sufb-RNAi* +Fe compared to WT +Fe control.
