# Supplementary material for: Iron deficiency and the loss of chloroplast iron–sulfur cluster assembly trigger distinct transcriptome changes in Arabidopsis rosettes
Source: Royal Society of Chemistry journal article supplement (doi:10.1039/d0mt00175a), 2020-10-13
Supplement: d0mt00175a4.pdf [file d0mt00175a4.pdf]

**Supplementary Table 1: Sequencing Quality of RNA-seq Samples:** Number of raw and cleaned (trimmed for quality) reads are presented for each sample. Q20 score represents the probability of one incorrect base call in 100 bases.

| <b>Sample name</b>         | <b>Raw Reads</b>       | <b>Clean Reads</b>    | <b>Q20 score</b> |
|----------------------------|------------------------|-----------------------|------------------|
| <i>WT+Fe R1 2 h</i>        | 8.1 x 10 <sup>7</sup>  | 7.9 x 10 <sup>7</sup> | 98.8             |
| <i>WT+Fe R2 2 h</i>        | 8.9 x 10 <sup>7</sup>  | 8.6 x 10 <sup>7</sup> | 98.6             |
| <i>WT+Fe R3 2 h</i>        | 7.0 x 10 <sup>7</sup>  | 6.8 x 10 <sup>7</sup> | 98.8             |
| <i>WT+Fe R1 26 h</i>       | 10.0 x 10 <sup>7</sup> | 9.8 x 10 <sup>7</sup> | 98.3             |
| <i>WT+Fe R2 26 h</i>       | 7.2 x 10 <sup>7</sup>  | 7.0 x 10 <sup>7</sup> | 98.8             |
| <i>WT+Fe R3 26 h</i>       | 8.8 x 10 <sup>7</sup>  | 8.5 x 10 <sup>7</sup> | 98.7             |
| <i>WT-Fe R1 2 h</i>        | 7.0 x 10 <sup>7</sup>  | 6.8 x 10 <sup>7</sup> | 98.7             |
| <i>WT-Fe R2 2 h</i>        | 9.0 x 10 <sup>7</sup>  | 8.7 x 10 <sup>7</sup> | 98.7             |
| <i>WT-Fe R3 2 h</i>        | 9.2 x 10 <sup>7</sup>  | 9.0 x 10 <sup>7</sup> | 98.8             |
| <i>WT-Fe R1 26 h</i>       | 7.1 x 10 <sup>7</sup>  | 6.9 x 10 <sup>7</sup> | 98.7             |
| <i>WT-Fe R2 26 h</i>       | 6.8 x 10 <sup>7</sup>  | 6.6 x 10 <sup>7</sup> | 98.7             |
| <i>WT-Fe R3 26 h</i>       | 8.4 x 10 <sup>7</sup>  | 8.2 x 10 <sup>7</sup> | 98.7             |
| <i>sufb2-2+Fe R1 2 h</i>   | 7.5 x 10 <sup>7</sup>  | 7.2 x 10 <sup>7</sup> | 98.7             |
| <i>sufb2-2 +Fe R2 2 h</i>  | 7.5 x 10 <sup>7</sup>  | 7.4 x 10 <sup>7</sup> | 98.6             |
| <i>sufb2-2+Fe R3 2 h</i>   | 8.2 x 10 <sup>7</sup>  | 8.1 x 10 <sup>7</sup> | 98.7             |
| <i>sufb2-2+Fe R1 26 h</i>  | 7.1 x 10 <sup>7</sup>  | 7.0 x 10 <sup>7</sup> | 98.6             |
| <i>sufb2-2 +Fe R2 26 h</i> | 7.2 x 10 <sup>7</sup>  | 7.1 x 10 <sup>7</sup> | 98.5             |
| <i>sufb2-2+Fe R3 26 h</i>  | 6.1 x 10 <sup>7</sup>  | 6.0 x 10 <sup>7</sup> | 98.1             |
| <i>average:</i>            | 7.7 x 10 <sup>7</sup>  | 7.5 x 10 <sup>7</sup> | 98.6             |
